# Supplementary material
Source: PubMed Central journal article supplement (PMC9707647)
Supplement: mmc1.pdf [file mmc1.pdf]

# THE LANCET

## Infectious Diseases

### Supplementary appendix

This appendix formed part of the original submission. We post it as supplied by the authors.

Supplement to: Arora P, Kempf A, Nehlmeier I, et al. Omicron sublineage BQ.1.1 resistance to monoclonal antibodies. *Lancet Infect Dis* 2022; published online Nov 18. [https://doi.org/10.1016/S1473-3099\(22\)00733-2](https://doi.org/10.1016/S1473-3099(22)00733-2).

# Appendix

## Omicron sublineage BQ.1.1 resistance to monoclonal antibodies

### Content

|                                |    |
|--------------------------------|----|
| Table .....                    | 1  |
| Methods .....                  | 3  |
| Limitations of the study ..... | 6  |
| Acknowledgements.....          | 7  |
| Supplementary references.....  | 8  |
| Supplementary figures .....    | 11 |

# Table

## Table: Antibody information

| Target        | Mode of action                                             | Authorisation status                                                                                                                                                                                                                                                                                             | Recommended use                                                                                                                                                                                                                                                                                                      | Ref.              |
|---------------|------------------------------------------------------------|------------------------------------------------------------------------------------------------------------------------------------------------------------------------------------------------------------------------------------------------------------------------------------------------------------------|----------------------------------------------------------------------------------------------------------------------------------------------------------------------------------------------------------------------------------------------------------------------------------------------------------------------|-------------------|
| RBD (RBM)     | Abrogates S protein/ACE2 interaction                       | <ul style="list-style-type: none"> <li>Monotherapy</li> <li>FDA: not approved</li> <li>EMA: not approved</li> <li>Combi-therapy with <i>Imdevimab</i></li> <li>FDA: authorised for clinical use (EUA); restricted (24.01.2022)</li> <li>EMA: authorised for clinical use</li> </ul>                              | <ul style="list-style-type: none"> <li>Monotherapy</li> <li>FDA: n/a</li> <li>EMA: n/a</li> <li>Combi-therapy with <i>Imdevimab</i></li> <li>FDA: early treatment in outpatients (risk patients)</li> <li>EMA: early treatment in outpatients and post exposure prophylaxis (risk patients)</li> </ul>               | 1-3               |
| RBD (not RBM) | Abrogates S protein/ACE2 interaction                       | <ul style="list-style-type: none"> <li>Monotherapy</li> <li>FDA: not approved</li> <li>EMA: not approved</li> <li>Combi-therapy with <i>Casirivimab</i></li> <li>FDA: authorised for clinical use (EUA); restricted (24.01.2022)</li> <li>EMA: authorised for clinical use</li> </ul>                            | <ul style="list-style-type: none"> <li>Monotherapy</li> <li>FDA: n/a</li> <li>EMA: n/a</li> <li>Combi-therapy with <i>Casirivimab</i></li> <li>FDA: early treatment in outpatients (risk patients)</li> <li>EMA: early treatment in outpatients and post exposure prophylaxis (risk patients)</li> </ul>             | 1-3               |
| RBD (RBM)     | Abrogates S protein/ACE2 interaction                       | <ul style="list-style-type: none"> <li>Monotherapy</li> <li>FDA: authorised for clinical use (EUA); revoked (15.01.2021)</li> <li>EMA: not approved</li> <li>Combi-therapy with <i>Etesevimab</i></li> <li>FDA: authorised for clinical use (EUA); restricted (24.01.2022)</li> <li>EMA: not approved</li> </ul> | <ul style="list-style-type: none"> <li>Monotherapy</li> <li>FDA: early treatment in outpatients (risk patients)</li> <li>EMA: n/a</li> <li>Combi-therapy with <i>Etesevimab</i></li> <li>FDA: early treatment in outpatients (risk patients)</li> <li>EMA: early treatment in outpatients (risk patients)</li> </ul> | 3-6               |
| RBD (RBM)     | Abrogates S protein/ACE2 interaction                       | <ul style="list-style-type: none"> <li>Monotherapy</li> <li>FDA: not approved</li> <li>EMA: not approved</li> <li>Combi-therapy with <i>Bamlanivimab</i></li> <li>FDA: authorised for clinical use (EUA); restricted (24.01.2022)</li> <li>EMA: not approved</li> </ul>                                          | <ul style="list-style-type: none"> <li>Monotherapy</li> <li>FDA: n/a</li> <li>EMA: n/a</li> <li>Combi-therapy with <i>Bamlanivimab</i></li> <li>FDA: early treatment in outpatients (risk patients)</li> <li>EMA: early treatment in outpatients (risk patients)</li> </ul>                                          | 3-6               |
| RBD (RBM)     | Abrogates S protein/ACE2 interaction                       | <ul style="list-style-type: none"> <li>Monotherapy</li> <li>FDA: not approved</li> <li>EMA: not approved</li> <li>Combi-therapy with <i>Tixagevimab</i></li> <li>FDA: authorised for clinical use (EUA)</li> <li>EMA: authorised for clinical use</li> </ul>                                                     | <ul style="list-style-type: none"> <li>Monotherapy</li> <li>FDA: n/a</li> <li>EMA: n/a</li> <li>Combi-therapy with <i>Tixagevimab</i></li> <li>FDA: pre-exposure prophylaxis</li> <li>EMA: pre-exposure prophylaxis</li> </ul>                                                                                       | 3, 7-9            |
| RBD (RBM)     | Abrogates S protein/ACE2 interaction                       | <ul style="list-style-type: none"> <li>Monotherapy</li> <li>FDA: not approved</li> <li>EMA: not approved</li> <li>Combi-therapy with <i>Cilgavimab</i></li> <li>FDA: authorised for clinical use (EUA)</li> <li>EMA: authorised for clinical use</li> </ul>                                                      | <ul style="list-style-type: none"> <li>Monotherapy</li> <li>FDA: n/a</li> <li>EMA: n/a</li> <li>Combi-therapy with <i>Cilgavimab</i></li> <li>FDA: pre-exposure prophylaxis</li> <li>EMA: pre-exposure prophylaxis</li> </ul>                                                                                        | 3, 7-9            |
| RBD (RBM)     | Abrogates S protein/ACE2 interaction                       | <ul style="list-style-type: none"> <li>Monotherapy</li> <li>FDA: not approved</li> <li>EMA: not approved</li> <li>Combi-therapy with <i>Romusevimab</i></li> <li>FDA: not approved (EUA pending)</li> <li>EMA: not approved</li> </ul>                                                                           | <ul style="list-style-type: none"> <li>Monotherapy</li> <li>FDA: n/a</li> <li>EMA: n/a</li> <li>Combi-therapy with <i>Romusevimab</i></li> <li>FDA: n/a</li> <li>EMA: n/a</li> </ul>                                                                                                                                 | 3, 10, 11         |
| RBD (not RBM) | Abrogates S protein/ACE2 interaction                       | <ul style="list-style-type: none"> <li>Monotherapy</li> <li>FDA: not approved</li> <li>EMA: not approved</li> <li>Combi-therapy with <i>Amubarvimab</i></li> <li>FDA: not approved (EUA pending)</li> <li>EMA: not approved</li> </ul>                                                                           | <ul style="list-style-type: none"> <li>Monotherapy</li> <li>FDA: n/a</li> <li>EMA: n/a</li> <li>Combi-therapy with <i>Amubarvimab</i></li> <li>FDA: n/a</li> <li>EMA: n/a</li> </ul>                                                                                                                                 | 3, 10, 11         |
| RBD (RBM)     | Abrogates S protein/ACE2 interaction                       | <ul style="list-style-type: none"> <li>Monotherapy</li> <li>FDA: not approved</li> <li>EMA: not approved</li> </ul>                                                                                                                                                                                              | <ul style="list-style-type: none"> <li>Monotherapy</li> <li>FDA: n/a</li> <li>EMA: n/a</li> </ul>                                                                                                                                                                                                                    | 12                |
| RBD (RBM)     | Abrogates S protein/ACE2 interaction                       | <ul style="list-style-type: none"> <li>Monotherapy</li> <li>FDA: not approved</li> <li>EMA: authorised for clinical use</li> </ul>                                                                                                                                                                               | <ul style="list-style-type: none"> <li>Monotherapy</li> <li>FDA: n/a</li> <li>EMA: early treatment in outpatients (risk patients)</li> </ul>                                                                                                                                                                         | 3, 13, 14         |
| RBD (not RBM) | Abrogates S protein/ACE2 interaction                       | <ul style="list-style-type: none"> <li>Monotherapy</li> <li>FDA: authorised for clinical use (EUA)</li> <li>EMA: not approved</li> </ul>                                                                                                                                                                         | <ul style="list-style-type: none"> <li>Monotherapy</li> <li>FDA: early treatment in outpatients (risk patients)</li> <li>EMA: n/a</li> </ul>                                                                                                                                                                         | 3, 7, 15-19       |
| RBD (not RBM) | Abrogates S protein-driven entry at a post attachment step | <ul style="list-style-type: none"> <li>Monotherapy</li> <li>FDA: authorised for clinical use; revoked (05.04.2022)</li> <li>EMA: authorised for clinical use</li> </ul>                                                                                                                                          | <ul style="list-style-type: none"> <li>Monotherapy</li> <li>FDA: early treatment in outpatients (risk patients)</li> <li>EMA: n/a</li> </ul>                                                                                                                                                                         | 3, 17, 18, 20, 21 |

| <b>mAb</b>          | <b>Alternative names</b>                                                                                                       | <b>Company</b>                               |
|---------------------|--------------------------------------------------------------------------------------------------------------------------------|----------------------------------------------|
| <b>Casirivimab</b>  | REGN10933, Ronapreve (cocktail with Imdevimab), REGN-COV2 (cocktail with Imdevimab), REGEN-COV (cocktail with Imdevimab)       | Regeneron Pharmaceuticals, Hoffmann-La Roche |
| <b>Imdevimab</b>    | REGN10987, Ronapreve (cocktail with Casirivimab), REGN-COV2 (cocktail with Casirivimab), REGEN-COV (cocktail with Casirivimab) | Regeneron Pharmaceuticals, Hoffmann-La Roche |
| <b>Bamlanivimab</b> | LY-CoV555, LY3819253                                                                                                           | Eli Lilly                                    |
| <b>Etesevimab</b>   | CB6, JS016, LY3832479, LY-CoV016                                                                                               | Eli Lilly                                    |
| <b>Cilgavimab</b>   | AZD1061, COV2-2130, Evusheld (cocktail with Tixagevimab), AZD7442 (cocktail with Tixagevimab)                                  | AstraZeneca                                  |
| <b>Tixagevimab</b>  | AZD8895, COV2-2196, Evusheld (cocktail with Cilgavimab), AZD7442 (cocktail with Cilgavimab)                                    | AstraZeneca                                  |
| <b>Amubarvimab</b>  | BR11-196, P2C-1F11                                                                                                             | Brii Biosciences                             |
| <b>Romlusevimab</b> | BR11-198, P2B-1G5                                                                                                              | Brii Biosciences                             |
| <b>Adintrevimab</b> | ADG20                                                                                                                          | Adagio Therapeutics                          |
| <b>Regdanvimab</b>  | Regkirona, CT-P59                                                                                                              | Celltrion Healthcare                         |
| <b>Bebtelovimab</b> | LY-CoV1404, LY3853113                                                                                                          | AbCellera, Eli Lilly                         |
| <b>Sotrovimab</b>   | Xevudy, VIR-7831, GSK4182136, S309                                                                                             | VIR Biotechnology, GlaxoSmithKline           |

Abbreviations: RBD, receptor-binding domain; RBM, receptor-binding motif; FDA, United States Food and Drug Administration; EMA, European Medicines Agency; EUA, emergency use authorization; Ref., references; n/a, not applicable.

## Methods

### Cell culture

Vero cells (African green monkey kidney, female, kidney; CRL-1586, ATCC; RRID: CVCL 0574, kindly provided by Andrea Maisner) and 293T (human, female, kidney; ACC-635, DSMZ; RRID: CVCL 0063) were cultivated at 37 °C in a humidified atmosphere containing 5 % CO<sub>2</sub> using Dulbecco's modified Eagle medium (PAN-Biotech), supplemented with 10% fetal bovine serum (Biochrom), 100 U/ml of penicillin, and 0.1 mg/ml of streptomycin (PAN-Biotech). Cell lines were validated by STR analysis, amplification and sequencing of a cytochrome c oxidase gene fragment, microscopic examination, and/or their specific growth characteristics. In addition, cell lines were routinely screened for mycoplasma contamination. Transfection of 293T cells was performed by calcium phosphate precipitation.

### Expression plasmids and sequence analysis

Expression plasmids pCAGGS-DsRed<sup>22</sup>, pCG1-SARS-CoV-2 B.1 SΔ18 (codon-optimised, C-terminal truncation of 18 amino acid residues, GISAID Accession ID: EPI\_ISL\_425259)<sup>23</sup>, pCG1-SARS-CoV-2 BA.1 SΔ18 (codon-optimised, C-terminal truncation of 18 amino acid residues, GISAID Accession ID: EPI\_ISL\_6640919)<sup>24</sup> and pCG1-SARS-CoV-2 BA.4/5 SΔ18 (codon-optimised, C-terminal truncation of 18 amino acid residues, GISAID Accession ID: EPI\_ISL\_11550739 and EPI\_ISL\_12029894)<sup>25</sup> have been described before. For the generation of expression plasmids for SARS-CoV-2 BA.2.75.2 SΔ18 (GISAID Accession ID: EPI\_ISL\_15019960), SARS-CoV-2 BJ.1 SΔ18 (GISAID Accession ID: EPI\_ISL\_14913530) and SARS-CoV-2 BQ.1.1 SΔ18 (GISAID Accession ID: EPI\_ISL\_14752457), overlapping DNA strings were purchased (five strings for each S protein; Thermo Fisher Scientific, sequences available upon request), and assembled into linearised (BamHI/XbaI digest) pCG1 plasmid (a kind gift of Roberto Cattaneo, Mayo Clinic College of Medicine, Rochester, MN, USA) by Gibson assembly using the GeneArt™ Gibson Assembly HiFi Master Mix (Thermo Fisher Scientific) according to manufacturer's instructions. In addition, the expression plasmids for SARS-CoV-2 BA.4.6 SΔ18 (GISAID Accession ID: EPI\_ISL\_14429885) was obtained by introducing R346T and N658S mutations into plasmid pCG1-SARS-CoV-2 BA.4/5 SΔ18 through overlap-extension PCR,

using overlapping primers that harbour the respective mutations, followed by restriction digest (BamHI/XbaI) and ligation of the S protein open reading frame into the pCG1 plasmid. Integrity of all S protein sequences was confirmed by Sanger sequencing (Microsynth SeqLab). Information on S protein sequences and Omicron sublineage distribution was obtained from GISAID (Global Initiative on Sharing All Influenza Data) (<https://gisaid.org/>) and CoV-Spectrum (<https://cov-spectrum.org/>) databases.

### **Pseudovirus particle production**

We employed a previously published protocol to generate particles pseudotyped with SARS-CoV-2 S proteins<sup>26</sup>. First, 293T cells transfected to express the respective S protein or DsRed (control) were inoculated with VSV-G-transcomplemented VSV\*G(FLuc) (kindly provided by Gert Zimmer)<sup>27</sup> at a multiplicity of infection of 3. After 1h of incubation, the inoculum was aspirated and cells were washed with PBS, before medium containing anti-VSV-G antibody (culture supernatant from I1-hybridoma cells; ATCC no. CRL-2700) was added and cells were further incubated for 16-18h. Next, cell culture supernatants were collected, clarified by centrifugation (4,000 x g, 10 min), and stored at -80 °C until further use.

### **Neutralisation assay**

Neutralisation assays were performed according to a previously published protocol<sup>28</sup>. One day before the neutralisation assay, Vero cells were seeded into 96-well plates and allowed to reach confluency the next day. Pseudotype particles were pre-incubated (30 min at 37°C) with different concentrations (5, 0.5, 0.05, 0.005, 0.0005 µg/ml) of monoclonal antibody (mAb; Casirivimab, Imdevimab, Bamlanivimab, Etesevimab, Cilgavimab, Tixagevimab, Adintrevimab, Amubarvimab, Romlusevimab, Regdanvimab, Bebtelovimab, Sotrovimab, or an unrelated human control antibody) or antibody cocktails (Casirivimab/Imdevimab, Bamlanivimab/Etesevimab, Cilgavimab/Tixagevimab, Amubarvimab/Romlusevimab; in case of mAb cocktails each antibody was used at half the concentration to keep total antibody concentrations constant). Next, pseudovirus/mAb-mixtures were then inoculated onto Vero cells and further incubated. After an incubation phase of 16–18 h, cell culture supernatants were aspirated and cells were lysed using PBS containing 0.5 % Triton X-100 (Carl Roth).

Following 30 min of incubation at room temperature, cell lysates were transferred into white 96-well plates, firefly luciferase substrate (Beetle-Juice, PJK) was added, and luminescence was recorded using a Hidex Sense plate luminometer (Hidex). Neutralisation efficiency was calculated based on the relative inhibition of pseudovirus entry, for which pseudovirus particles incubated with medium without mAb served as reference (=0% inhibition).

### **Information on epitopes of monoclonal antibodies**

Information on epitopes of monoclonal antibodies was retrieved from literature<sup>2, 6, 12, 15, 21, 29-32</sup> and published protein structures (PDB\_6XDG, PDB\_7L3N, PDB\_7C01, PDB\_6WPS, PDB\_7L7E, PDB\_7CM4, PDB\_8GX9, PDB\_7U2D, PDB\_7MMO).

### **Data analysis**

For data analysis Microsoft Excel (part of Microsoft Office Professional Plus, version 2016, Microsoft Corporation) and GraphPad Prism version 8.3.0 (GraphPad Software) were used. Antibody concentrations resulting to a half-maximal inhibition (effective concentration 50, EC50) were calculated using a non-linear regression model.

## **Limitations of the study**

This study has limitations. First, we utilised pseudotype particles bearing SARS-CoV-2 S protein to study SARS-CoV-2 neutralisation. Although pseudovirus particles have been demonstrated to faithfully recapitulate SARS-CoV-2 host cell entry and its neutralisation, our data await formal confirmation with clinical SARS-CoV-2 isolates. Second, the highest mAb concentration tested was 5 µg/ml, which is below the typical concentrations for treatment with respect to the total blood volume (e.g., 600 mg of Casirivimab and 600 mg of Imdevimab per patient, which roughly translates into a blood concentration of 100-150 µg/ml for adults based on a total blood volume of 4-6 l). Third, this calculation does not factor in additional neutralisation due to vaccination- or infection-induced antibodies.



## **Acknowledgements**

We gratefully acknowledge the originating laboratories responsible for obtaining the specimens, as well as the submitting laboratories where the genome data were generated and shared via GISAID, on which this research is based.

## Supplementary references

1. Group RC. Casirivimab and imdevimab in patients admitted to hospital with COVID-19 (RECOVERY): a randomised, controlled, open-label, platform trial. *Lancet* 2022; **399**(10325): 665-76.
2. Hansen J, Baum A, Pascal KE, et al. Studies in humanized mice and convalescent humans yield a SARS-CoV-2 antibody cocktail. *Science* 2020; **369**(6506): 1010-4.
3. Focosi D, McConnell S, Casadevall A, Cappello E, Valdiserra G, Tuccori M. Monoclonal antibody therapies against SARS-CoV-2. *The Lancet Infectious diseases* 2022.
4. Chen P, Behre G, Hebert C, et al. Bamlanivimab and Etesevimab Improve Symptoms and Associated Outcomes in Ambulatory Patients at Increased Risk for Severe Coronavirus Disease 2019: Results From the Placebo-Controlled Double-Blind Phase 3 BLAZE-1 Trial. *Open Forum Infect Dis* 2022; **9**(5): ofac172.
5. Gottlieb RL, Nirula A, Chen P, et al. Effect of Bamlanivimab as Monotherapy or in Combination With Etesevimab on Viral Load in Patients With Mild to Moderate COVID-19: A Randomized Clinical Trial. *Jama* 2021; **325**(7): 632-44.
6. Jones BE, Brown-Augsburger PL, Corbett KS, et al. The neutralizing antibody, LY-CoV555, protects against SARS-CoV-2 infection in nonhuman primates. *Science translational medicine* 2021; **13**(593).
7. Cochran W, Salto-Alejandre S, Barker L, et al. COVID-19 Outcomes in Solid Organ Transplant Recipients Who Received Tixagevimab-cilgavimab Prophylaxis and/or Bebtelovimab Treatment in a Nurse-driven Monoclonal Antibody Program During the Omicron Surge. *Transplantation* 2022.
8. Group AC--TfIwC-S. Tixagevimab-cilgavimab for treatment of patients hospitalised with COVID-19: a randomised, double-blind, phase 3 trial. *The Lancet Respiratory medicine* 2022; **10**(10): 972-84.
9. Levin MJ, Ustianowski A, De Wit S, et al. Intramuscular AZD7442 (Tixagevimab-Cilgavimab) for Prevention of Covid-19. *The New England journal of medicine* 2022; **386**(23): 2188-200.
10. Ji Y, Zhang Q, Cheng L, et al. Preclinical characterization of amubarvimab and romlusevimab, a pair of non-competing neutralizing monoclonal antibody cocktail, against SARS-CoV-2. *Frontiers in immunology* 2022; **13**: 980435.
11. Hoy SM. Amubarvimab/Romlusevimab: First Approval. *Drugs* 2022; **82**(12): 1327-31.

12. Yuan M, Zhu X, He WT, et al. A broad and potent neutralization epitope in SARS-related coronaviruses. *Proceedings of the National Academy of Sciences of the United States of America* 2022; **119**(29): e2205784119.
13. Kim JY, Sandulescu O, Preotescu LL, et al. A Randomized Clinical Trial of Regdanvimab in High-Risk Patients With Mild-to-Moderate Coronavirus Disease 2019. *Open forum infectious diseases* 2022; **9**(8): ofac406.
14. Ryu DK, Song R, Kim M, et al. Therapeutic effect of CT-P59 against SARS-CoV-2 South African variant. *Biochemical and biophysical research communications* 2021; **566**: 135-40.
15. Westendorf K, Zentelis S, Wang L, et al. LY-CoV1404 (bebtelovimab) potently neutralizes SARS-CoV-2 variants. *Cell reports* 2022; **39**(7): 110812.
16. Razonable RR, O'Horo JC, Hanson SN, et al. Outcomes of Bebtelovimab Treatment is Comparable to Ritonavir-boosted Nirmatrelvir among High-Risk Patients with Coronavirus Disease-2019 during SARS-CoV-2 BA.2 Omicron Epoch. *The Journal of infectious diseases* 2022.
17. Razonable RR, Tulledge-Scheitel SM, Hanson SN, et al. Real-world Clinical Outcomes of Bebtelovimab and Sotrovimab Treatment of High-risk Persons With Coronavirus Disease 2019 During the Omicron Epoch. *Open forum infectious diseases* 2022; **9**(10): ofac411.
18. Yetmar ZA, Beam E, O'Horo JC, et al. Outcomes of bebtelovimab and sotrovimab treatment of solid organ transplant recipients with mild-to-moderate coronavirus disease 2019 during the Omicron epoch. *Transplant infectious disease : an official journal of the Transplantation Society* 2022; **24**(4): e13901.
19. Shertel T, Lange NW, Salerno DM, et al. Bebtelovimab for Treatment of COVID-19 in Ambulatory Solid Organ Transplant Recipients. *Transplantation* 2022; **106**(10): e463-e4.
20. Gupta A, Gonzalez-Rojas Y, Juarez E, et al. Effect of Sotrovimab on Hospitalization or Death Among High-risk Patients With Mild to Moderate COVID-19: A Randomized Clinical Trial. *JAMA* 2022; **327**(13): 1236-46.
21. Pinto D, Park YJ, Beltramello M, et al. Cross-neutralization of SARS-CoV-2 by a human monoclonal SARS-CoV antibody. *Nature* 2020; **583**(7815): 290-5.
22. Hoffmann M, Kleine-Weber H, Schroeder S, et al. SARS-CoV-2 Cell Entry Depends on ACE2 and TMPRSS2 and Is Blocked by a Clinically Proven Protease Inhibitor. *Cell* 2020; **181**(2): 271-80 e8.

23. Hoffmann M, Arora P, Gross R, et al. SARS-CoV-2 variants B.1.351 and P.1 escape from neutralizing antibodies. *Cell* 2021; **184**(9): 2384-93 e12.
24. Hoffmann M, Kruger N, Schulz S, et al. The Omicron variant is highly resistant against antibody-mediated neutralization: Implications for control of the COVID-19 pandemic. *Cell* 2022; **185**(3): 447-56 e11.
25. Arora P, Kempf A, Nehlmeier I, et al. Augmented neutralisation resistance of emerging omicron subvariants BA.2.12.1, BA.4, and BA.5. *The Lancet Infectious diseases* 2022; **22**(8): 1117-8.
26. Kleine-Weber H, Elzayat MT, Wang L, et al. Mutations in the Spike Protein of Middle East Respiratory Syndrome Coronavirus Transmitted in Korea Increase Resistance to Antibody-Mediated Neutralization. *J Virol* 2019; **93**(2).
27. Berger Rentsch M, Zimmer G. A vesicular stomatitis virus replicon-based bioassay for the rapid and sensitive determination of multi-species type I interferon. *PLoS One* 2011; **6**(10): e25858.
28. Arora P, Zhang L, Kruger N, et al. SARS-CoV-2 Omicron sublineages show comparable cell entry but differential neutralization by therapeutic antibodies. *Cell host & microbe* 2022; **30**(8): 1103-11 e6.
29. Shi R, Shan C, Duan X, et al. A human neutralizing antibody targets the receptor-binding site of SARS-CoV-2. *Nature* 2020; **584**(7819): 120-4.
30. Dong J, Zost SJ, Greaney AJ, et al. Genetic and structural basis for SARS-CoV-2 variant neutralization by a two-antibody cocktail. *Nature microbiology* 2021; **6**(10): 1233-44.
31. Kim C, Ryu DK, Lee J, et al. A therapeutic neutralizing antibody targeting receptor binding domain of SARS-CoV-2 spike protein. *Nature communications* 2021; **12**(1): 288.
32. Corti D, Purcell LA, Snell G, Veesler D. Tackling COVID-19 with neutralizing monoclonal antibodies. *Cell* 2021; **184**(12): 3086-108.

# Supplementary figures

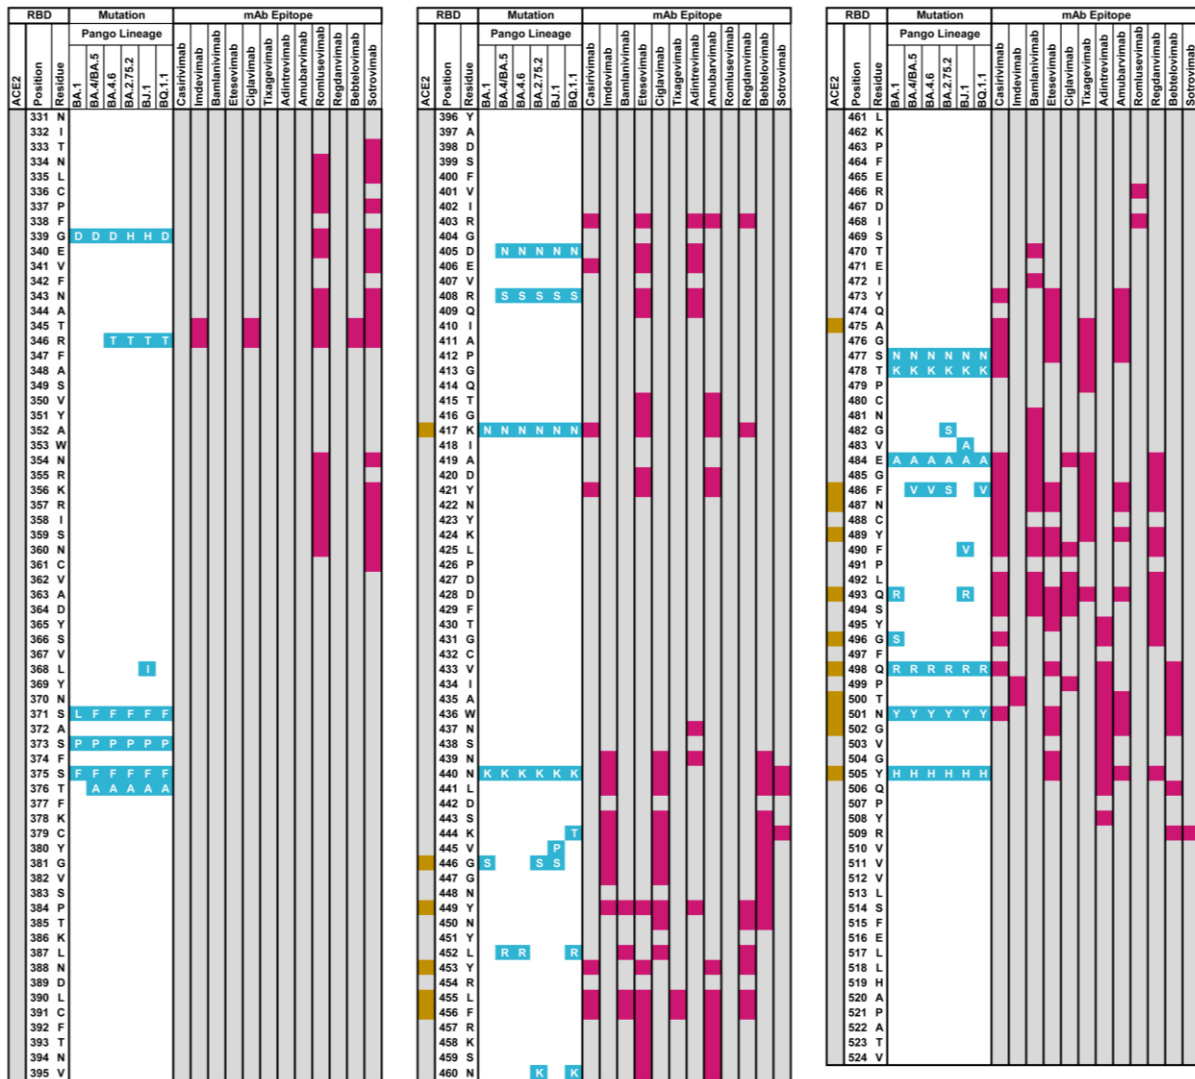

**Figure S1: Location of mAb epitopes and Omicron sublineage-specific RBD mutations.**

Omicron sublineage-specific RBD mutations are highlighted in blue (numbering according to SARS-CoV-2 Wuhan-Hu-01). RBD residues that interact with ACE2 (yellow) or that are part of the epitopes that are recognised by mAbs (pink) are indicated.

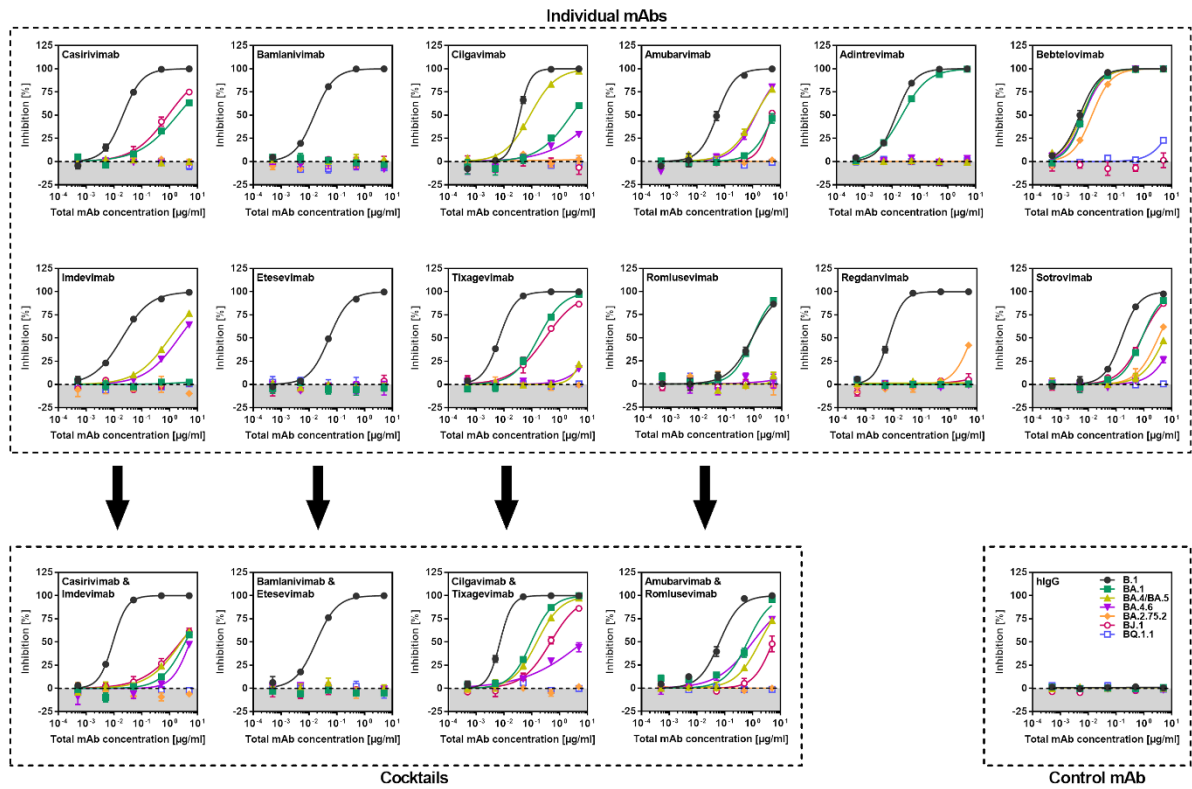

**Figure S2: Individual mAb neutralisation data.**

Pseudovirus particles harbouring the indicated S proteins were preincubated with different concentrations of single mAbs or mAb cocktails before being inoculated onto Vero cells (of note, for mAb cocktails, each antibody was used at half concentration to keep total antibody concentrations identical). Pseudovirus entry was analysed and normalised to samples containing no antibody (= 0% inhibition). Further, data for a human control antibody that does not target the S protein (hIgG) are shown. Presented are the mean data of three biological replicates (performed with four technical replicates). Error bars represent the standard error of the mean.
